# Supplementary material
Source: bioRxiv or medRxiv preprint supplement (https://www.biorxiv.org/content/biorxiv/early/2019/04/24/617985/DC1/embed/media-1.pdf)
Supplement: Supplementary file [file media-1.pdf]

Table S1: Primers used for real-PCR in this study

| Gene name           | Forward primer         | Reverse primer        | Reference                                                                        |
|---------------------|------------------------|-----------------------|----------------------------------------------------------------------------------|
| <i>broad</i>        | ACAACAACAGCCCCGACTT    | GCTTGTCGCTGATGGAGATT  |                                                                                  |
| <i>E74</i>          | ATTCGCTGCGGAACATATGG   | GTAGGACGTTGTCAGGTAGC  |                                                                                  |
| <i>E75</i>          | GCAGCAGCAGATCGGAATACTC | CCGACTCAATGCCCGAATCC  |                                                                                  |
| <i>torso</i>        | ACTTTTTACGTGAGG AGTGG  | CATGGATGG AATTTCTAGGG |                                                                                  |
| <i>rp49 (RpL32)</i> | CAGGCCCAAGATCGTGAAGAA  | TGCGCTTGTTGATCCGTAA   |                                                                                  |
| <i>nvd</i>          | GCTGACGACTGTGTTATATGCC | GTCCACTTCCTGCGAAATCCA | <a href="http://www.flyrnai.org/FlyPrimerBank">www.flyrnai.org/FlyPrimerBank</a> |
| <i>Shade</i>        | TTCCTGCCAGCCTTGAATG    | GAAATTGGGAACCACCAGTGT | <a href="http://www.flyrnai.org/FlyPrimerBank">www.flyrnai.org/FlyPrimerBank</a> |
| <i>dib</i>          | GATCCCAAGGACATAGCTTTGC | CTTGCGATATTGAGCCAGTGC | <a href="http://www.flyrnai.org/FlyPrimerBank">www.flyrnai.org/FlyPrimerBank</a> |
